# Supplementary material
Source: Frontiers journal article supplement (https://www.frontiersin.org/articles/432114)
Supplement: Data_Sheet_7.PDF [file Data_Sheet_7.PDF]

| Type    | Sub-Type                    | Name of drug                                  | Type           | Clinical Trial | Clinical Trial # | Type/Route /Delivery     | Pubmed                       | Recruitment Status                                              | Details                                                                                                                                                                                                                                                                                                                                                                                                                                                                                                                                                                                                       |
|---------|-----------------------------|-----------------------------------------------|----------------|----------------|------------------|--------------------------|------------------------------|-----------------------------------------------------------------|---------------------------------------------------------------------------------------------------------------------------------------------------------------------------------------------------------------------------------------------------------------------------------------------------------------------------------------------------------------------------------------------------------------------------------------------------------------------------------------------------------------------------------------------------------------------------------------------------------------|
| Topical | Corticosteroid              | Fluocinonide                                  | Small molecule | Phase 0        | NCT02176148      | cream                    | 28476075, 19821298           | Recruiting                                                      | A topical glucocorticoid, synthetic steroids used topically as anti-inflammatory and antipruritic agents. Corticosteroids play a role in cellular signaling, immune function, inflammation, and protein regulation; however, the precise mechanism of action of fluocinonide cream in corticosteroid responsive dermatoses is unknown.                                                                                                                                                                                                                                                                        |
|         | Calcineurin inhibitor       | Pimecrolimus (Elidel)                         | Small molecule | Unknown        | NCT00222183      | cutaneous/cream          | 18797893                     | Recruiting status is unknown currently, completion date passed. | Topical calcineurin inhibitors: down-regulate T-cell activity by inhibiting the phosphatase calcineurin, responsible for dephosphorylation of the nuclear factor of activated T cells. It has a higher affinity to skin due to its lipophilic characteristic .                                                                                                                                                                                                                                                                                                                                                |
|         |                             | Tacrolimus                                    | Small molecule | Phase II       | NCT00317681      | ointment                 | 14513247, 16547761, 16501922 | Completed                                                       | Tacrolimus targets T lymphocytes and suppresses their activation by inhibiting the expression of cytokine genes, such as IL-2. Therefore, treatment of cutaneous lupus erythematosus with topical tacrolimus might result in an improvement of skin lesions in such patients.                                                                                                                                                                                                                                                                                                                                 |
|         | Anti-inflammatory           | R-salbutamol sulphate (ASF-1096; Levabuterol) | Small molecule | Phase II       | NCT00625157      | cream                    | 19681862                     | Completed                                                       | R-salbutamol binds to and activates B2 adrenoreceptors and inhibits CD4 cells and other leukocytes (monocytes, macrophages and langerhans cells). It thus inhibits activation of inflammatory genes, proinflammatory cytokines IL-2 and IFN-g. R -salbutamol also inhibits superoxide generation and peroxiase release.                                                                                                                                                                                                                                                                                       |
|         | Glucocorticoid              | Methylprednisolone Acetate                    | Small molecule | FDA app        | (NDA) 011757     | intralesional            | 14278445                     | Completed                                                       | Methylprednisolone acetate is a prodrug of methylprednisolone Because of methylprednisolone's low water solubility, a sodium acetate salt of methylprednisolone is used as an injectable dosage form.                                                                                                                                                                                                                                                                                                                                                                                                         |
|         | Corticosteroids (synthetic) | Triamcinolone diacetate                       | Small molecule | FDA app        | (NDA) 084072     | intralesional            |                              | Discontinued                                                    | Triamcinolone diacetate is a synthetic corticosteroid. It is a prodrug of triamcinolone. Aristocort /Kenacort discontinued                                                                                                                                                                                                                                                                                                                                                                                                                                                                                    |
|         |                             | Triamcinolone acetonide                       | Small molecule | FDA app        | (NDA) 012041     | intralesional/injectable | 28342206                     | Discontinued                                                    | The acetonide salt form of triamcinolone, a synthetic glucocorticosteroid with immunosuppressive and anti-inflammatory activity. Triamcinolone acetonide                                                                                                                                                                                                                                                                                                                                                                                                                                                      |
|         |                             | Triamcinolone hexacetonide                    | Small molecule | FDA app        | (NDA) 016466     | intralesional/injectable | 28343615                     | Completed                                                       | Triamcinolone injection is a steroid. It prevents the release of inflammatory substances.                                                                                                                                                                                                                                                                                                                                                                                                                                                                                                                     |
|         | Anti- malarial              | Hydroxychloroquine                            | Small molecule | FDA app        | (NDA) 009768     | oral/tablet              | 21768444, 90616669, 9733451  | Completed                                                       | Chloroquine and hydroxychloroquine increase pH within intracellular vacuoles and alter processes such as protein degradation by acidic hydrolases in the lysosome, assembly of macromolecules in the endosomes, and posttranslation modification of proteins in the Golgi apparatus. Antimalarials also inhibit binding of antigens to the major histocompatibility complex. The inhibition of antigen processing also impairs the production of antibodies, the activity of natural killer cells, and the release of interleukin-1, interleukin-2, and tumor necrosis factor-alfa. Smoking reduces efficacy. |

|                            |                     |              |                |           |                                                         |                |                    |            |                                                                                                                                                                                                                                                                                                                                                                                                                                                                                                                                                                                                                                                                                                                                                                                                                                               |
|----------------------------|---------------------|--------------|----------------|-----------|---------------------------------------------------------|----------------|--------------------|------------|-----------------------------------------------------------------------------------------------------------------------------------------------------------------------------------------------------------------------------------------------------------------------------------------------------------------------------------------------------------------------------------------------------------------------------------------------------------------------------------------------------------------------------------------------------------------------------------------------------------------------------------------------------------------------------------------------------------------------------------------------------------------------------------------------------------------------------------------------|
| Systemic                   | Retinoids           | Alitretinoin | Small molecule | Phase II  | NCT01407679                                             | oral/capsule   | 22890744           | Terminated | 9-cis-retinoic acid is an active retinoid that regulates expression of retinoid responsive genes, serving as ligand for two classes of ligand-dependent transcription factors, the retinoic acid receptors and retinoid X receptors. Their use is limited in young women due to teratogenicity. There is report of the vitamin-A derivative, alitretinoin in the treatment of CLE patients (PMID: 22890744)                                                                                                                                                                                                                                                                                                                                                                                                                                   |
|                            | Thalidomide         | Thalidomide  | Small molecule | Phase II  | NCT00001680                                             | topical        | 27097914, 26872954 | Completed  | Thalidomide is known to inhibit synthesis of TNF-alfa and to modify the expression of TNF-alfa-induced adhesion molecules on endothelial cells and human leukocytes. Thalidomide inhibits inflammatory cytokine synthesis and prevents UVB –induced keratinocyte apoptosis. Neurotoxic tetragenic side effects. Dose should be reduced to a minimum.                                                                                                                                                                                                                                                                                                                                                                                                                                                                                          |
|                            | Lenalidomide        | Lenalidomide | Small molecule | Phase IV  | NCT01408199, NCT00633945                                | oral           | 26873674, 24528907 | Completed  | A thalidomide analog with potential antineoplastic activity. Lenalidomide inhibits TNF-alfa production, stimulates T cells, reduces serum levels of the cytokines vascular endothelial growth factor (VEGF) and basic fibroblast growth factor (bFGF), and inhibits angiogenesis. This agent also promotes G1 cell cycle arrest and apoptosis of malignant cells.                                                                                                                                                                                                                                                                                                                                                                                                                                                                             |
|                            | Methotrexate        | Methotrexate | Small molecule | Phase III | NCT00470522                                             | oral, IV or SC | 16029342           | Completed  | MTX inhibits the enzyme dihydrofolate reductase and thus T-cell proliferation. MTX was first used for SLE but is now shown to be effective to a degree for DLE and SCLE. Significant reduction in autoantibodies. Side effects : nephro- and hepato- and bone marrow- toxicity. PMID:11907517. Low doses of MTX in carefully selected CLE patients (carefully monitored for side effects and contraindications) appears to be safe as shown by Wenzel et al., 2005. PMID 16029342                                                                                                                                                                                                                                                                                                                                                             |
| Experimental Agents /Small | Immuno-suppressants | Tanzisertib  | Small molecule | Phase II  | NCT01466725                                             | oral/capsule   | 25475995           | Terminated | An orally active anti-fibrotic JNK inhibitor.                                                                                                                                                                                                                                                                                                                                                                                                                                                                                                                                                                                                                                                                                                                                                                                                 |
|                            |                     | TRX-1        | Biologic       | Phase Ib  | <a href="http://bit.ly/2s0ifj">http://bit.ly/2s0ifj</a> |                | Tolerex Inc.       |            | TRX1 is a novel humanized monoclonal antibody (MAb) that binds to the CD4 receptor found on both T effector cells and T regulatory cells. TRX1 is expected to block the activation and function of T effector cells and to favor dominance of T regulatory cells. This process, referred to as down regulation of the immune system, results in hyporesponsiveness, or tolerance, to antigens. In a preclinical study in a primate model, administration of TRX1 during the development of a primary immune response to a foreign protein, or antigen, resulted in longstanding and specific tolerance to that antigen. This type of suppression of the immune system may have therapeutic benefit in treating autoimmune diseases that occur when the human immune system mistakenly identifies the components of the human body as foreign. |
|                            |                     | AMG557       | Biologic       | Phase I   | NCT01389895                                             | SC/ injection  | 23370250           | Terminated | AMG-557 is a blocking anti-ICOSL antibody. AMG-557 prevent the interaction of B7RP-1 with ICOS on the surface of activated T cells. <a href="http://bit.ly/1BBiPz7">http://bit.ly/1BBiPz7</a>                                                                                                                                                                                                                                                                                                                                                                                                                                                                                                                                                                                                                                                 |
|                            |                     | AMG811       | Biologic       | Phase I   | NCT01164917                                             |                | 28118537           | Terminated | AMG 811 is a fully human monoclonal antibody that binds to interferon gamma, a widely active pro-inflammatory cytokine. It is being investigated as a treatment DLE.                                                                                                                                                                                                                                                                                                                                                                                                                                                                                                                                                                                                                                                                          |
|                            |                     | CC-11050     | Small molecule | Phase II  | NCT01300208                                             | oral           | 26981575           | Completed  | CC-11050 is an oral, small-molecule, tumor necrosis factor (TNF)-alpha and PDE 4 inhibitor. There are safety concerns.                                                                                                                                                                                                                                                                                                                                                                                                                                                                                                                                                                                                                                                                                                                        |

| molecules and biologics                                              |             | R333         | Small molecule | Phase II                          | NCT01597050                                               | cutaneous /ointment                                                                      | Rigel Pharmaceu-<br>ticals, Inc.                                                                                                          | Completed          | R333 (R-932333) is a topical JAK/spleen tyrosine kinase (SYK) inhibitor.                                                                                                                                                                  |            |                                                                                                                                                                                                                                                                                                         |
|----------------------------------------------------------------------|-------------|--------------|----------------|-----------------------------------|-----------------------------------------------------------|------------------------------------------------------------------------------------------|-------------------------------------------------------------------------------------------------------------------------------------------|--------------------|-------------------------------------------------------------------------------------------------------------------------------------------------------------------------------------------------------------------------------------------|------------|---------------------------------------------------------------------------------------------------------------------------------------------------------------------------------------------------------------------------------------------------------------------------------------------------------|
|                                                                      |             | KRP-203      | Small molecule | Phase II                          | NCT01294774                                               | oral                                                                                     | not found                                                                                                                                 | Terminated         | Sphingosine-1-phosphate receptor (S1PR) agonist.                                                                                                                                                                                          |            |                                                                                                                                                                                                                                                                                                         |
|                                                                      |             | PD0360324    | Biologic       | Phase I                           | NCT01470313                                               | intravenous                                                                              | not found                                                                                                                                 | Terminated         | Human mAb against macrophage colony stimulating factor (M-CSF). The decision to terminate the trial was not based on any clinical safety or efficacy concerns.                                                                            |            |                                                                                                                                                                                                                                                                                                         |
|                                                                      |             | Apremilast   | Small molecule | Phase I/II                        | NCT00708916                                               | oral/tablet                                                                              | 23134988                                                                                                                                  | Completed          | Apremilast is a well-tolerated, selective PDE4 (phosphodiesterase-4) inhibitor with a demonstrated inhibitory effect on inflammatory mediators and is under development for the treatment of inflammatory and immune mediated conditions. |            |                                                                                                                                                                                                                                                                                                         |
|                                                                      |             | Efalizumab   | Biologic       | Phase II                          | NCT00308204                                               | subcutaneous/<br>injection                                                               | 28521707                                                                                                                                  | Terminated         | Immunosuppressive recombinant humanized IgG1 kappa isotype mAb that binds to human CD11a.                                                                                                                                                 |            |                                                                                                                                                                                                                                                                                                         |
|                                                                      |             | Etanercept   | Biologic       | Phase II                          | NCT00797784                                               | subcutaneous                                                                             | 28626974                                                                                                                                  | Recruiting         | It interferes with tumor necrosis factor (TNF; a soluble inflammatory cytokine) by acting as a TNF inhibitor. PMID: 19638570 PMID: 16134723, PMID: 16490847, PMID: 14969575                                                               |            |                                                                                                                                                                                                                                                                                                         |
|                                                                      |             | Sirukumab    | Biologic       | Phase I                           | NCT01702740                                               | intravenous/infusion                                                                     | 24525782                                                                                                                                  | Completed          | Sirukumab (CNTO 136) is a human anti-interleukin-6 (IL-6) monoclonal antibody                                                                                                                                                             |            |                                                                                                                                                                                                                                                                                                         |
| Drugs for the proposed novel CCLE/DLE relevant molecular target-CCR2 |             |              |                |                                   |                                                           |                                                                                          |                                                                                                                                           |                    |                                                                                                                                                                                                                                           |            |                                                                                                                                                                                                                                                                                                         |
| Type                                                                 | Sub-Type    | Name of drug | Type           | Clinical Trial                    | Link to study                                             | Disease                                                                                  | Pubmed/<br>PMID #                                                                                                                         | Recruitment Status | Target Molecule                                                                                                                                                                                                                           | Effect     | Details                                                                                                                                                                                                                                                                                                 |
| Suggested Novel Agents in present study                              | Xenobiotics | CCX915       | Small molecule | Phase I                           | <a href="http://bit.ly/2uj2vEK">http://bit.ly/2uj2vEK</a> | Multiple sclerosis, rheumatoid arthritis, diabetes mellitus and cardiovascular diseases. | <a href="http://ir.chemocentryx.com/releasedetail.cfm?ReleaseID=290843">http://ir.chemocentryx.com/releasedetail.cfm?ReleaseID=290843</a> | Started            | CCR2                                                                                                                                                                                                                                      | Inhibition | CCX915 is a highly selective inhibitor of the CCR2 chemokine receptor which is implicated in the damaging inflammation underlying multiple sclerosis and other autoimmune and inflammatory diseases-Chemocentryx discovered CCX915 using the company's proprietary high throughput screening RAM Assay™ |
|                                                                      |             | CCX140-B     | Small molecule | Phase II-Type 2 Diabetes Mellitus | NCT01028963                                               |                                                                                          | 26268910                                                                                                                                  | Completed          | CCR2                                                                                                                                                                                                                                      | Inhibition | CCX140 is a potent and selective small molecule antagonist of the CCR2 chemokine receptor.                                                                                                                                                                                                              |
|                                                                      |             | TAK-779      | Small molecule | Preclinical                       |                                                           |                                                                                          | 18270317, 16870431, 12954060, 12496074                                                                                                    |                    | CCR2                                                                                                                                                                                                                                      | Inhibition | TAK-779 was discovered as an extremely potent antagonist of chemokine receptors CCR2 and CCR5 with a small molecular weight.                                                                                                                                                                            |
|                                                                      | Biologic    | MLN1202      | mAB            | Phase II-Multiple sclerosis       | NCT01199640                                               |                                                                                          | 18576534                                                                                                                                  | Completed          | CCR2                                                                                                                                                                                                                                      | Inhibition | Humanized monoclonal antibody that specifically targets the CCR2 chemokine receptor.                                                                                                                                                                                                                    |

**Supplementary Table 7. Existing emerging and experimental therapeutic agents in treatment of CCLE/DLE.** Details of drugs and therapeutic agents involved in DLE treatment have been included in this table linked to some of the ongoing or completed clinical trials. The standard of care is topical application of corticosteroids and their derivatives on a case by case basis with a second line of treatment using systemic drugs that have been used in systemic lupus or other inflammatory diseases previously. Several drugs that are effectively used in other autoimmune and inflammatory diseases show severe side effects upon long-term usage in patients with CCLE/DLE, and thus need to be used with care. Due to the lack of well-designed clinical trials, none of the drugs have passed all criteria for final approval. We have included some of the new therapeutic agents which make use of humanized monoclonal antibodies, biologics and small molecules that

being tested in private clinics and linked the limited literature connected to these treatments. In the "Disease Road Map" (Figure 3), we have pinpointed some of the known targets of the treatments in CLE. We have used the known therapeutic approaches in CLE along with our strategy of combining genome-wide expression with chromosome mapping to discover and speculate about drugs that target the CCLE-related molecule *CCR2*. These drugs are being used in the clinic currently to treat diseases other than CCLE. We include in the suggested novel agents in present study section (shaded in grey). Drugs that are FDA approved for diseases other than CLE can be searched for by the (NDA) number in: <http://www.accessdata.fda.gov/scripts/cder/drugsatfda/index.cfm> . Clinical trials can be found linked to NCT# at <https://clinicaltrials.gov> Abbreviations : mAB = monoclonal antibody.

**Running title:** Interactome analysis: Cutaneous lupus- **Dey-Rao and Sinha, 2018**

---
